# Supplementary material
Source: publisher site journal article supplement (https://www.degruyterbrill.com/publication/isbn/9783110278415/downloadAsset/9783110278415_Inhaltsverzeichnis.pdf)
Supplement: Supplementary file 1 [file 9783110278415_Inhaltsverzeichnis.pdf]

## Inhaltsverzeichnis

### Zur Einführung

*Marcus Müller, Sandra Kluwe*

Kunstkommunikation und Identität.....1

### Aufriss der Perspektiven

*Heiner Keupp*

Prekäre Verortungen in der Spätmoderne. Zum Patchwork Personaler und Kollektiver Identitäten.....25

*Andreas Gardt*

Zur Rhetorik des Kunstdiskurses.....47

*Ulla Fix*

Politische Identität durch Sprachkunst.....67

### Kunstkommunikation als soziale Praxis

*Heiko Hausendorf*

Soziale Positionierungen im Kunstbetrieb. Linguistische Aspekte einer Soziologie der Kunstkommunikation.....93

*Marcus Müller*

Die Gesellschaft vor dem Bild. Eine Studie zu Habitus und sozialer Position bei der sprachlichen Bewältigung von Kunst.....125

*Ingo Warnke*

August Schmarsow und die Debatte um Architektur als Kunst. Bemerkungen zur diskursiven Statuierung von Architektur im kulturellen Feld .....143

*Anja Schürmann*

Kunsthistorisches Beschreiben zwischen Identifikation und Repräsentation. Ortungsstrategien und Lokaldeixis im Galeriekatalog des 19. Jahrhunderts.....157

## Identitätsarbeit durch künstlerische Praktiken

*Maria Peters*

Kunst und biographische Entwürfe aus kunstpädagogischer Sicht.....175

*Eva Sturm*Über Wissensproduktion angeregt durch Kunst, zwei Arbeiten  
von Markus Binner.....189*Karin-Sophie Richter-Reichenbach*Ästhetisch-künstlerische Identitätsarbeit aus der Sicht ‚Pädagogischer  
Kunsttherapie‘ und Kunstdidaktik.....205*Sandra Kluwe*Die „Polyphrenie“ einer „Conglomeratseele“. Bildnerisch-textuelle  
Spiegelungen stigmatisierter Identität am Beispiel eines Patienten der  
Sammlung Prinzhorn.....219

## Identitätsentwürfe in der Sprachkunst

*Monika Schmitz-Emans*Kommunikation über Kunst als ‚biographische Belustigung‘. Ästhetische  
Reflexionen und Spiele mit Ich-Figurationen bei Jean Paul.....241*Friederike Reents*

„Der Idiot von Arles“. Van Gogh und die literarische Moderne.....253

## Entwürfe kollektiver Identität im Kunstdiskurs

*Gerhard Straehle*Der Naumburger Meister als *deutscher* Künstler. Rückblick auf eine  
Naumburg-Forschung unter nationalen Vorzeichen.....273*Anja Lobenstein-Reichmann*Julius Langbehn's „Rembrandt als Erzieher“. Diskursive Traditionen und  
begriffliche Fäden eines nicht ungefährlichen Buches.....295*Hildegard Frübis*Der Kunstdiskurs der jüdischen Moderne als Identitätsdiskurs. Von  
Rembrandt zu Max Liebermann.....319

**Gesellschaftliche Bedingungen der gegenwärtigen Kunstkritik**

|                                                  |     |
|--------------------------------------------------|-----|
| <i>Eduard Beaucamp</i><br>Kunst ohne Kritik..... | 339 |
| Autorinnen und Autoren.....                      | 349 |
| Sachregister.....                                | 355 |
